# Supplementary material
Source: PubMed Central journal article supplement (PMC6330153)
Supplement: NIHMS982748-supplement-Figure_S1__Table_S1-4.pdf [file NIHMS982748-supplement-Figure_S1__Table_S1-4.pdf]

## Supplemental Section

Figure S1. Analytical resolution of 26DM (quantitation ion peak), as compared between injections made on a DB-17MS (top chromatogram) and a DB-FFAP (bottom chromatogram) analytical column. In each chromatogram, 26DM analyte peak is labeled with an asterisk.

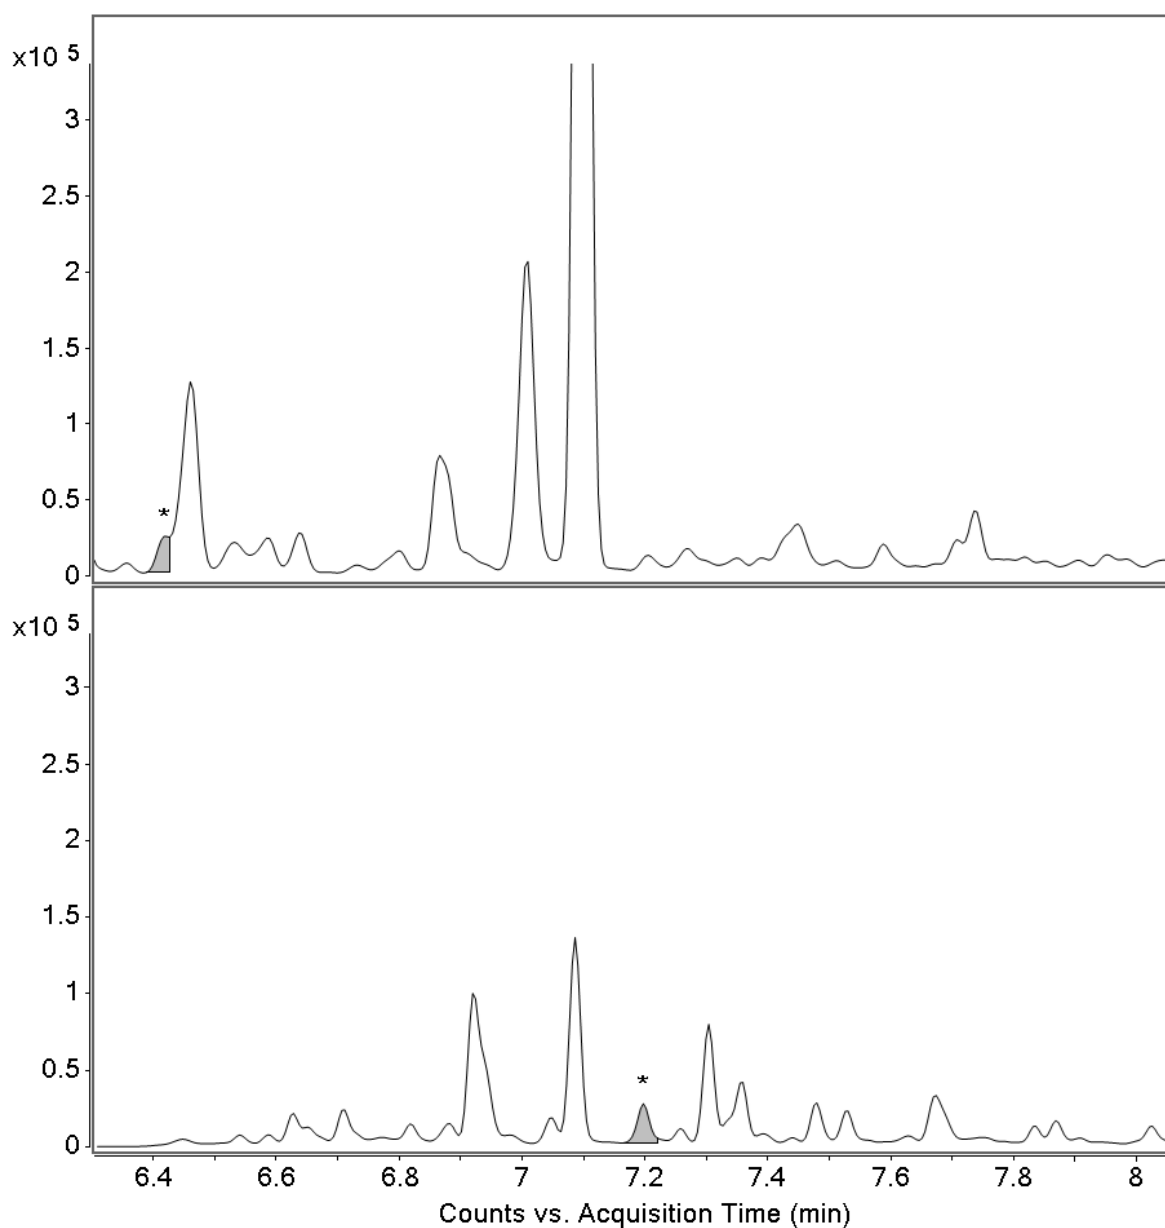

**Table S1:** Instrument operation parameters and settings.

| Agilent 7890A, 7890B            |                                                                                                   | Agilent 7000C                   |                              |
|---------------------------------|---------------------------------------------------------------------------------------------------|---------------------------------|------------------------------|
| Instrument operation parameters | Setting                                                                                           | Instrument operation parameters | Setting                      |
| Injection port                  | Pulsed splitless                                                                                  | MSD mode                        | Positive ion detection       |
| Injection port temperature      | 250°C                                                                                             | Ionization mode                 | Electron impact              |
| Injection volume                | 1 µL                                                                                              | Source temperature              | 280°C                        |
| Injection pulse pressure        | 30 psi until 0.35 min                                                                             | Quad temperature                | 150°C                        |
| Septum purge flow               | 3 mL/min                                                                                          | Collision gas                   | N <sub>2</sub> at 1.5 mL/min |
| Purge flow to split vent        | 60 mL/min at 0.35 min                                                                             | Collision pressure              | 35 psi                       |
| Column 1                        | Constant flow 1.68 ± 0.05 mL/min (analytical run)<br>Constant flow -2.20 ± 0.05 mL/min (post-run) | Quench gas                      | He at 2.25 mL/min            |
| Column 2                        | Constant flow 1.85 ± 0.05 mL/min (analytical run)<br>Constant flow 10.5 ± 0.05 mL/min (post-run)  | Detector gain                   | 20 (x 10 <sup>5</sup> )      |
| MSD transfer line temperature   | 280°C                                                                                             |                                 |                              |
| Oven program (analytical run)   | 80°C (hold 2 min)<br>30°C/min ramp to 180°C<br>15°C/min ramp to 240°C                             |                                 |                              |
| Oven program (post-run)         | 240°C (hold 5.5 min)                                                                              |                                 |                              |

**Table S2:** Compound-dependent MS parameters and ion transitions for AA analysis.

| Analyte |                                        | Precursor ion<br>( <i>m/z</i> ) | Product ion<br>( <i>m/z</i> ) | Collision energy<br>( <i>V</i> ) | Dwell time<br>( <i>ms</i> ) |
|---------|----------------------------------------|---------------------------------|-------------------------------|----------------------------------|-----------------------------|
| OTOL    | Quantitation ion                       | 253                             | 116                           | 30                               | 55                          |
|         | Confirmation ion                       | 253                             | 106                           | 25                               | 17                          |
|         | Internal standard,<br>quantitation ion | 259                             | 122                           | 30                               | 35                          |
|         | Internal standard,<br>confirmation ion | 259                             | 112                           | 25                               | 35                          |
| 26DM    | Quantitation ion                       | 267                             | 148                           | 10                               | 65                          |
|         | Confirmation ion                       | 267                             | 120                           | 25                               | 65                          |
|         | Internal standard,<br>quantitation ion | 273                             | 154                           | 15                               | 65                          |
|         | Internal standard,<br>confirmation ion | 273                             | 126                           | 30                               | 65                          |
| OANS    | Quantitation ion                       | 269                             | 135                           | 30                               | 35                          |
|         | Confirmation ion                       | 269                             | 190                           | 15                               | 55                          |
|         | Internal standard,<br>quantitation ion | 276                             | 139                           | 35                               | 35                          |
|         | Internal standard,<br>confirmation ion | 276                             | 157                           | 15                               | 35                          |
| 1AMN    | Quantitation ion                       | 289                             | 144                           | 20                               | 45                          |
|         | Confirmation ion                       | 289                             | 127                           | 30                               | 45                          |
|         | Internal standard,<br>quantitation ion | 295                             | 150                           | 20                               | 45                          |
|         | Internal standard,<br>confirmation ion | 296                             | 151                           | 20                               | 45                          |
| 2AMN    | Quantitation ion                       | 289                             | 144                           | 20                               | 45                          |
|         | Confirmation ion                       | 289                             | 127                           | 30                               | 45                          |
|         | Internal standard,<br>quantitation ion | 296                             | 151                           | 20                               | 45                          |
|         | Internal standard,<br>confirmation ion | 295                             | 150                           | 20                               | 45                          |
| 4ABP    | Quantitation ion                       | 315.1                           | 170                           | 30                               | 65                          |
|         | Confirmation ion                       | 315.1                           | 141                           | 40                               | 65                          |
|         | Internal standard,<br>quantitation ion | 324                             | 179                           | 20                               | 65                          |
|         | Internal standard,<br>confirmation ion | 324                             | 150                           | 45                               | 65                          |

**Table S3:** Sample processing and instrument parameters were varied from method conditions to test the ruggedness of assay. Three different column lots were tested to assess the ruggedness of the DB-FFAP column.

| Analyte | Measured concentration (ng/L) |                    |                    |                           |                           |                           |                                  |                                  |                                  |                                 |                                 |                                 | Column lot #1                             | Column lot #2 (%-diff)                                                          | Column lot #1                            | Column lot #3 (%-diff)                                                          |
|---------|-------------------------------|--------------------|--------------------|---------------------------|---------------------------|---------------------------|----------------------------------|----------------------------------|----------------------------------|---------------------------------|---------------------------------|---------------------------------|-------------------------------------------|---------------------------------------------------------------------------------|------------------------------------------|---------------------------------------------------------------------------------|
|         | 3 µL PFFA, control            | 2 µL PFFA (%-diff) | 4 µL PFFA (%-diff) | 15 hr hydrolysis, control | 14 hr hydrolysis (%-diff) | 16 hr hydrolysis (%-diff) | 250°C inlet temperature, control | 240°C inlet temperature (%-diff) | 260°C inlet temperature (%-diff) | 30 psi pulsed pressure, control | 25 psi pulsed pressure (%-diff) | 35 psi pulsed pressure (%-diff) |                                           |                                                                                 |                                          |                                                                                 |
| OTOL    | 448.1                         | 515.9 (15.12)      | 441.8 (-1.40)      | 448.1                     | 460.4 (2.73)              | 513.1 (14.49)             | 214.7                            | 219.0 (2.02)                     | 203.4 (-5.27)                    | 214.7                           | 181.2 (-15.61)                  | 215.1 (0.20)                    | 345.9<br>600.0<br>842.4<br>431.4<br>750.1 | 341.9 (-1.16)<br>327.9 (-12.78)<br>394.9 (6.92)<br>466.6 (7.84)<br>753.3 (0.42) | 170.8<br>488.1<br>84.4<br>159.4<br>491.4 | 154.0 (-9.83)<br>480.5 (0.49)<br>73.9 (-14.65)<br>168.4 (5.62)<br>562.5 (14.46) |
| 26DM    | 456.0                         | 413.9 (-9.23)      | 419.6 (-7.98)      | 456.0                     | 435.1 (-4.60)             | 411.6 (-9.74)             | 150.7                            | 149.1 (-1.02)                    | 154.7 (2.65)                     | 150.7                           | 156.2 (3.67)                    | 152.3 (1.09)                    | 139.2<br>281.2<br>192.7<br>65.2<br>221.6  | 146.6 (3.13)<br>319.4 (12.72)<br>212.7 (9.90)<br>66.7 (0.75)<br>216.8 (-2.21)   | 108.6<br>445.1<br>17.7<br>112.8<br>454.6 | 113.4 (4.40)<br>495.8 (11.39)<br>19.5 (10.20)<br>120.3 (6.70)<br>474.4 (4.36)   |
| OANS    | 403.4                         | 391.9 (-2.86)      | 375.2 (-7.00)      | 403.4                     | 398.6 (-1.20)             | 389.2 (-3.52)             | 133.6                            | 139.4 (4.33)                     | 138.2 (3.49)                     | 133.6                           | 141.3 (6.81)                    | 151.3 (13.27)                   | 125.8<br>345.2<br>307.6<br>63.5<br>290.4  | 125.2 (-0.45)<br>345.6 (0.13)<br>295.9 (-3.89)<br>64.3 (1.36)<br>300.7 (3.49)   | 147.1<br>475.8<br>41.8<br>143.7<br>462.4 | 143.8 (-2.24)<br>474.1 (-0.35)<br>43.3 (3.50)<br>145.9 (1.51)<br>471.2 (1.90)   |
| 1AMN    | 314.9                         | 295.4 (-6.21)      | 311.7 (-1.02)      | 314.9                     | 319.3 (1.39)              | 287.7 (-8.64)             | 97.9                             | 106.8 (9.15)                     | 98.6 (0.71)                      | 97.9                            | 98.8 (0.96)                     | 100.7 (2.87)                    | 40.7<br>40.9<br>60.0<br>23.9<br>22.7      | 37.3 (-8.81)<br>38.4 (-6.46)<br>58.5 (-3.52)<br>21.9 (-9.26)<br>21.9 (-3.45)    | 102.5<br>433.6<br>13.0<br>99.9<br>419.9  | 97.1 (-5.27)<br>415.1 (-4.26)<br>13.4 (3.01)<br>99.0 (-0.97)<br>378.9 (-9.78)   |
| 2AMN    | 315.8                         | 309.5 (-2.00)      | 308.2 (-2.43)      | 315.8                     | 312.8 (-0.95)             | 311.3 (-1.44)             | 93.0                             | 101.7 (9.37)                     | 91.2 (-1.89)                     | 93.0                            | 92.0 (-1.08)                    | 92.9 (-0.07)                    | 10.4<br>317.7<br>497.5<br>16.8<br>386.1   | 10.3 (-1.19)<br>309.5 (-2.62)<br>488.7 (-1.78)<br>16.5 (-1.54)<br>393.5 (-0.69) | 108.3<br>442.9<br>15.0<br>102.6<br>436.5 | 102.6 (-5.31)<br>434.2 (-1.97)<br>15.7 (4.60)<br>98.6 (-3.90)<br>424.8 (-2.69)  |
| 4ABP    | 337.0                         | 335.9 (-0.32)      | 334.3 (-0.78)      | 337.0                     | 344.6 (2.26)              | 335.7 (-0.38)             | 105.6                            | 119.5 (13.20)                    | 112.9 (6.91)                     | 105.6                           | 114.1 (8.10)                    | 118.4 (12.17)                   | 24.8<br>267.8<br>339.7<br>21.6<br>283.5   | 24.4 (-1.72)<br>271.8 (1.49)<br>332.4 (-2.17)<br>21.6 (0.24)<br>283.7 (0.08)    | 413.5<br>5.2<br>52.5<br>105.6<br>405.2   | 444.1 (7.42)<br>5.4 (3.98)<br>61.3 (16.75)<br>111.7 (5.75)<br>405.7 (0.14)      |

**Table S4:** Characterization statistics obtained for QC low and high pools, using 39 replicates from each pool.

| Analyte | QC low pool, averaged concentration (ng/L) |      | QC high pool, averaged concentration (ng/L) |      |
|---------|--------------------------------------------|------|---------------------------------------------|------|
|         | CV                                         | CV   | CV                                          | CV   |
| OTOL    | 150.7                                      | 8.76 | 485.9                                       | 6.44 |
| 26DM    | 121.29                                     | 7.80 | 502.6                                       | 4.22 |
| OANS    | 153.4                                      | 2.74 | 505.8                                       | 4.33 |
| 1AMN    | 110.8                                      | 5.56 | 458.1                                       | 5.11 |
| 2AMN    | 111.7                                      | 5.27 | 479.8                                       | 5.01 |
| 4ABP    | 109.0                                      | 4.04 | 446.1                                       | 5.24 |
